# Supplementary material
Source: MDPI journal article supplement (https://www.mdpi.com/1999-4907/13/12/1971)

**Supplementary Figure S2:** Graphical representation of the Mantel test results between epigenetic distance (based on MSPs) and genetic distance estimated with MIPs (a) or AFLPs (b), and between genetic distances calculated with MIPs and AFLPs (c), for ES, SE and DE provenances.

a.

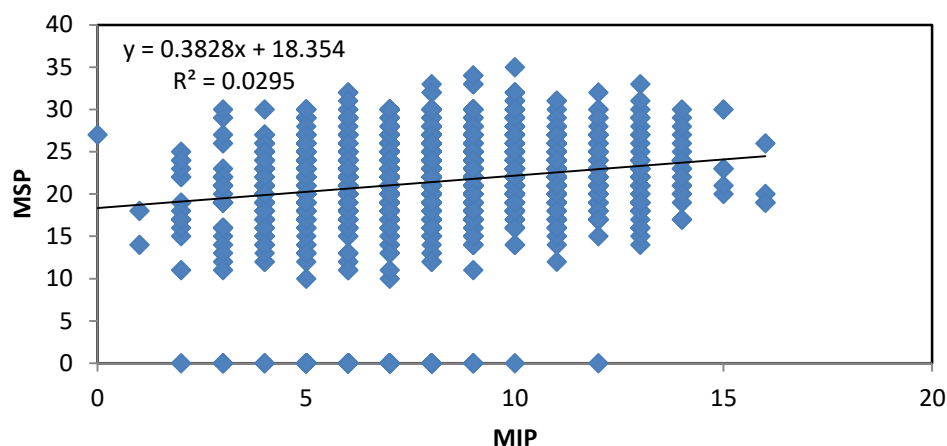

b.

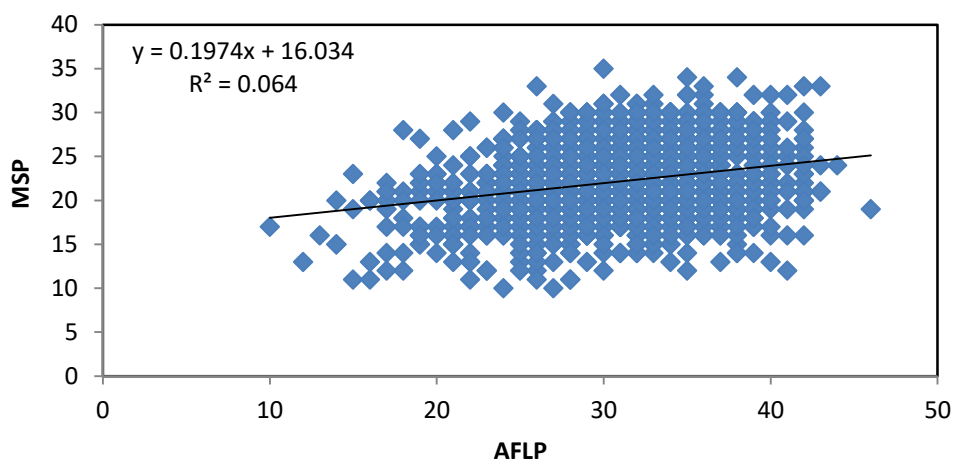

c.

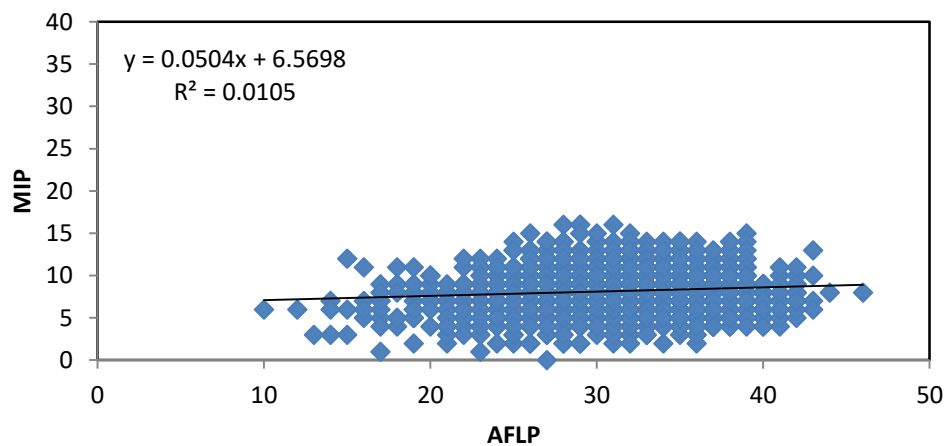

Supplement: s1 [file s1]
