# Supplementary material
Source: MDPI journal article supplement (https://www.mdpi.com/1999-4907/13/12/1971)
Supplement: s1 [file s1]

**Supplementary Figure S1:** Scoring and interpretation of different banding patterns obtained in MSAP assay

|                                                                                                                                                                                                                                                                                                                                              | <b>Banding pattern</b><br>( <i>EcoRI/HpaII</i> )/( <i>EcoRI/MspI</i> ) | <b>Interpretation</b>                                       | <b>Scoring</b> |
|----------------------------------------------------------------------------------------------------------------------------------------------------------------------------------------------------------------------------------------------------------------------------------------------------------------------------------------------|------------------------------------------------------------------------|-------------------------------------------------------------|----------------|
| <sup>5'</sup> CCGG<br>GGCC <sub>5'</sub> <i>Non<br/>methylation</i>                                                                                                                                                                                                                                                                          | 1/1                                                                    | Non-methylated<br>cytosines                                 | 0              |
| <sup>5'</sup> C <sup>m</sup> CG G<br>G GC <sup>m</sup> C <sub>5'</sub> <i>Full &amp; hemi-<br/>methylation of<br/>internal cytosine</i><br><sup>5'</sup> C <sup>m</sup> CGG<br>G GCC <sub>5'</sub>                                                                                                                                           | 0/1                                                                    | Fully methylated &<br>hemi-methylated<br>internal cytosines | 1              |
| <sup>5'</sup> <sup>m</sup> CCGG<br>GGCC <sub>5</sub> <i>Hemi-methylation<br/>of external cytosine</i>                                                                                                                                                                                                                                        | 1/0                                                                    | Hemi-methylated<br>external cytosine                        | 1              |
| <sup>5'</sup> <sup>m</sup> C <sup>m</sup> CG G <i>Full &amp; hemi-methylation<br/>of both cytosines</i><br>G GC <sup>m</sup> C <sub>5'</sub> <i>Mutation<br/>(unknow)</i><br><sup>5'</sup> CCTG<br>GGNC <sub>5'</sub> <i>Full-methylation of<br/>external cytosine</i><br><sup>5'</sup> <sup>m</sup> CCGG<br>GGCC <sup>m</sup> <sub>5'</sub> | 0/0                                                                    | No information                                              | 0              |
