# Supplementary material
Source: MDPI journal article supplement (https://www.mdpi.com/1999-4907/13/12/1971)
Supplement: s1 [file s1]

**Supplementary Table S1:** Sequences of adapters and primers used in MSAP and AFLP assay

|          | Name                  | Sequence              |
|----------|-----------------------|-----------------------|
| Adapters | <i>HpaII/MspI</i>     | 5'GACGATGAGTCTCGAT    |
|          |                       | 5'CGATCGAGACTCAT      |
|          | <i>EcoRI</i>          | 5'CTCGTAGACTGCGTACC   |
|          |                       | 5'AATTGGTACGCAGTC     |
|          | <i>MseI</i>           | 5'GACGATGAGTCCTGAG    |
| Primers  |                       | 5'TACTCAGGACTCAT      |
|          | <i>HpaII/MspI-A</i>   | 5'GATGAGTCTCGATCGGA   |
|          | <i>HpaII/MspI-AAT</i> | 5'GATGAGTCTCGATCGGAAT |
|          | <i>HpaII/MspI-ATC</i> | 5'GATGAGTCTCGATCGGATC |
|          | <i>HpaII/MspI-ACT</i> | 5'GATGAGTCTCGATCGGACT |
|          | <i>EcoRI-A</i>        | 5'GACTGCGTACCAATTCA   |
|          | <i>EcoRI-AAC</i>      | 5'GACTGCGTACCAATTCAAC |
|          | <i>EcoRI-ACG</i>      | 5'GACTGCGTACCAATTCACG |
|          | <i>EcoRI-AAT</i>      | 5'GACTGCGTACCAATTCAAT |
|          | <i>EcoRI-ACC</i>      | 5'GACTGCGTACCAATTCACC |
|          | <i>EcoRI-ATC</i>      | 5'GACTGCGTACCAATTCATC |
|          | <i>EcoRI-ACA</i>      | 5'GACTGCGTACCAATTCACA |
|          | <i>EcoRI-ATA</i>      | 5'GACTGCGTACCAATTCATA |
|          | <i>MseI-C</i>         | 5'ATGAGTCCTGAGTAAC    |
|          | <i>Mse-CCA</i>        | 5'ATGAGTCCTGAGTAACCA  |
|          | <i>Mse-CAT</i>        | 5'ATGAGTCCTGAGTAACAT  |
